# Supplementary material
Source: publisher site journal article supplement (https://www.dovepress.com/article/265322)
Supplement: Supplementary file 1 [file get_supplementary_file.php]

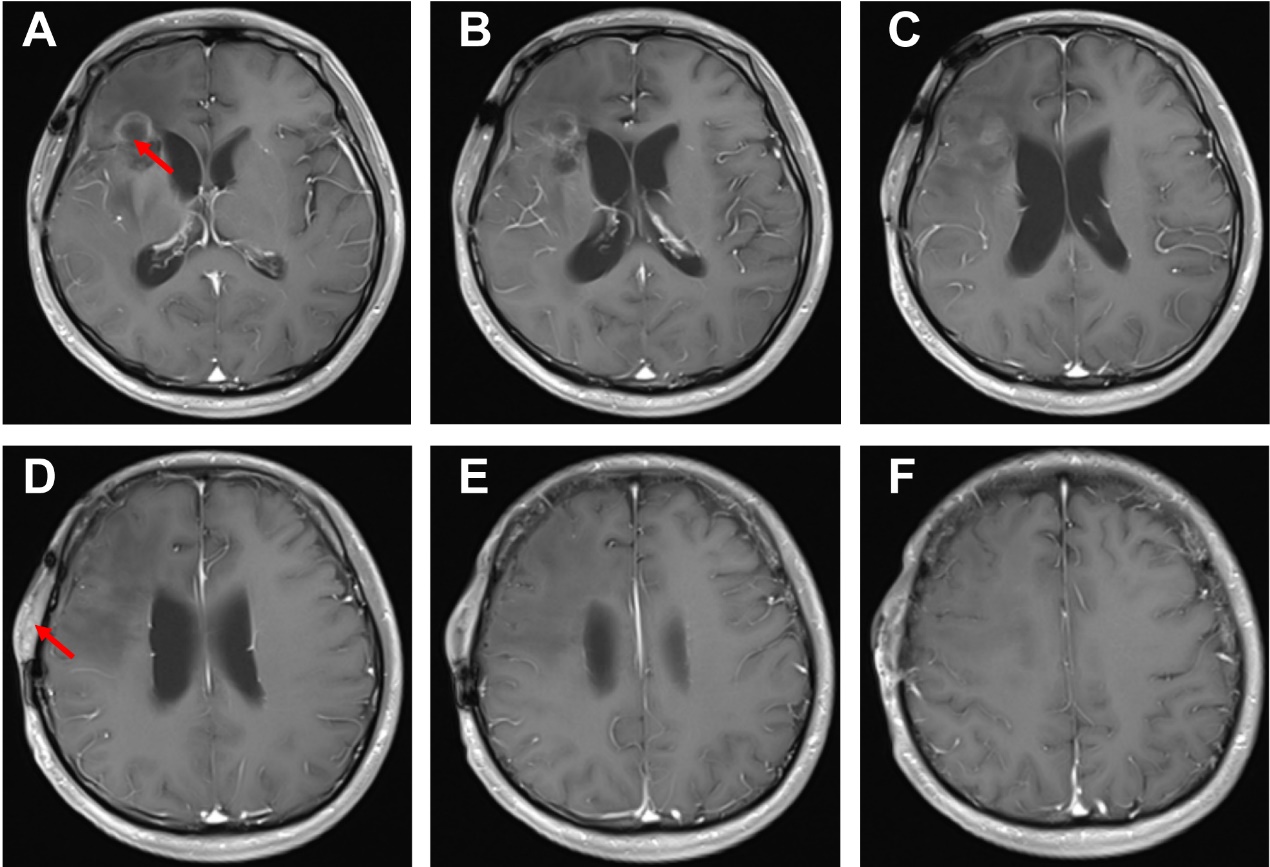


**Figure. S1 Continuous MR images around the extracranial tumor.**

（A-F）Continuous MR images of this patient's head. The intracranial (A) and extracranial tumor (E) were indicated by the red arrow.
